# Supplementary material for: Synthesis, characterization and immobilization of a new cobalt(ii) complex on modified magnetic nanoparticles as catalyst for epoxidation of alkenes and oxidation of activated alkanes
Source: Royal Society of Chemistry journal article supplement (doi:10.1039/c6ra18154f), 2016-01-01
Supplement: c6ra18154f1.pdf [file c6ra18154f1.pdf]

## Supplementary Materials:

### Synthesis, characterization and immobilization of a new cobalt (II) complex on modified magnetic nanoparticles as catalyst for epoxidation of alkenes and oxidation of activated alkanes

Zeinab Asgharpour, Faezeh Farzaneh \*, Alireza Abbasi

**Table S1** Selected crystallographic data and details for the structure refinement of complex1

|                                                       |                                                                   |
|-------------------------------------------------------|-------------------------------------------------------------------|
| Empirical formula                                     | C <sub>28</sub> H <sub>28</sub> CoN <sub>2</sub> O <sub>6</sub>   |
| Formula weight                                        | 547.45                                                            |
| Temperature (K)                                       | 94(2)                                                             |
| Wavelength (Å)                                        | 0.71073                                                           |
| Crystal system; space group                           | Triclinic, P <sup>-1</sup>                                        |
| <i>a</i> (Å)                                          | 6.2460(12)                                                        |
| <i>b</i> (Å)                                          | 9.5510(19)                                                        |
| <i>c</i> (Å)                                          | 11.301(2)                                                         |
| $\alpha$ (°)                                          | 97.11(3)                                                          |
| $\beta$ (°)                                           | 96.87(3)                                                          |
| $\gamma$ (°)                                          | 106.95(3)                                                         |
| <i>V</i> (Å <sup>3</sup> )                            | 631.3(2)                                                          |
| <i>Z</i>                                              | 1                                                                 |
| Absorption coeff. (mm <sup>-1</sup> )                 | 0.726                                                             |
| <i>D</i> <sub>x</sub> (Mg m <sup>-3</sup> )           | 1.44                                                              |
| <i>R</i> <sub>int</sub>                               | 0.0541                                                            |
| Crystal size (mm <sup>3</sup> )                       | 0.25 × 0.07 × 0.05                                                |
| $\theta$ Range for collection (°)                     | 1.84-25.00                                                        |
| Index ranges                                          | -7 ≤ <i>h</i> ≤ 7<br>-11 ≤ <i>k</i> ≤ 11<br>-13 ≤ <i>l</i> ≤ 13   |
| Reflections collected                                 | 4836                                                              |
| Independent reflections                               | 2098                                                              |
| Independent reflections [ <i>I</i> > 2σ ( <i>I</i> )] | 1889                                                              |
| Data / restraints / parameters                        | 2098 / 0 / 177                                                    |
| Final <i>R</i> indices [ <i>I</i> > 2σ ( <i>I</i> )]  | <i>R</i> <sub>1</sub> = 0.0459<br><i>wR</i> <sub>2</sub> = 0.097  |
| <i>R</i> indices (all data)                           | <i>R</i> <sub>1</sub> = 0.0543<br><i>wR</i> <sub>2</sub> = 0.1015 |

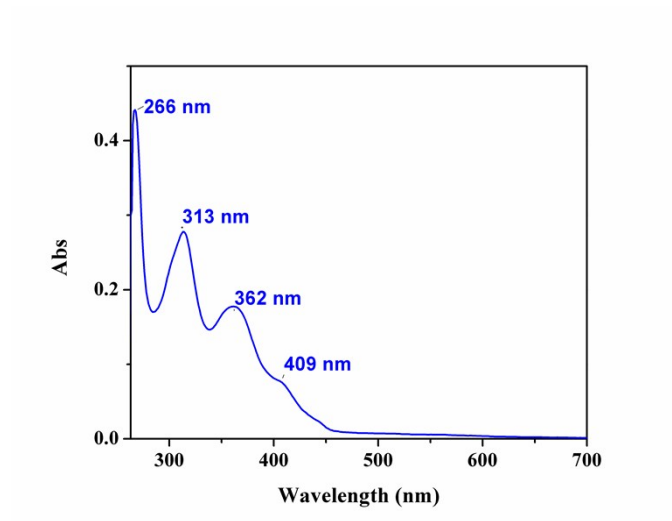

**Figure S1.** Electronic spectra of complex **1**(  $1 \times 10^{-5}$  M in DMF).
